# Supplementary material for: Nanoencapsulated Myricetin to Improve Antioxidant Activity and Bioavailability: A Study on Zebrafish Embryos
Source: MDPI journal article supplement (doi:10.3390/chemistry4010001), 2021-12-31
Supplement: s1 [file s1]

# **Nanoencapsulated Myricetin to Improve Antioxidant Activity and Bioavailability: A Study on Zebrafish Embryos**

**Gopikrishna Agraharam, Agnishwar Girigoswami and Koyeli Girigoswami \***

Faculty of Allied Health Sciences, Chettinad Hospital and Research Institute, Chettinad Academy of Research and Education, Kelambakkam 603103, Tamilnadu, India; agopikrishna4912@gmail.com (G.A.); agnishwarg@gmail.com (A.G.)

\* Corresponding author: koyelig@gmail.com or koyelig@care.edu.in; Tel.: +91-9600060358; Fax: +91-0-4447411011

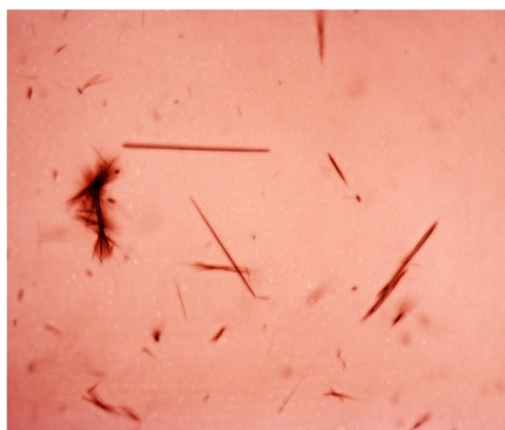

**Figure S1.** Microscopic image of myricetin at 400 X magnification.

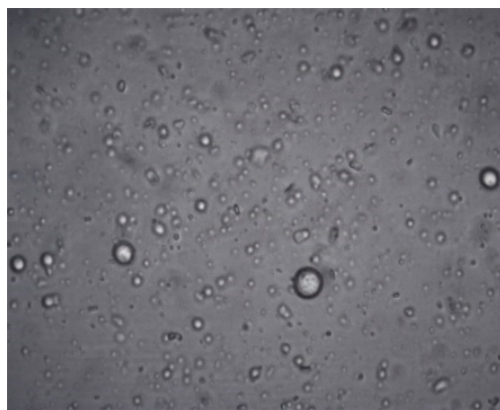

**Figure S2.** Microscopic image of liposomes at 400 X magnification.

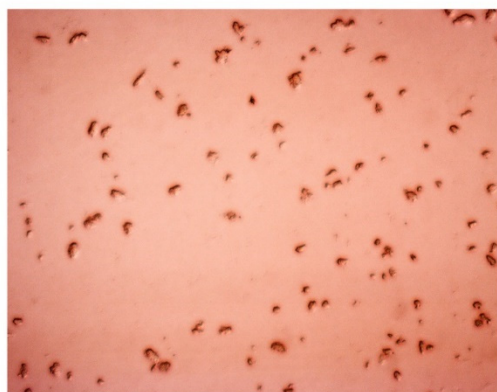

**Figure S3.** Microscopic image of liposomal encapsulated myricetin at 400 X magnification.
