# Supplementary material for: Nanoencapsulated Myricetin to Improve Antioxidant Activity and Bioavailability: A Study on Zebrafish Embryos
Source: MDPI journal article supplement (doi:10.3390/chemistry4010001), 2021-12-31
Supplement: s1 [file s1]

Archive with 1 entries (1 files):
- chemistry-1493872-supplementary.pdf
